# Supplementary material for: The Simple One-step stool processing method for detection of Pulmonary tuberculosis: A study protocol to assess the robustness, stool storage conditions and sampling strategy for global implementation and scale-up
Source: PubMed Central journal article supplement (PMC9531811; doi:10.1371/journal.pone.0264103), 2022-10-04
Supplement: pone.0264103.s002.pdf [file pone.0264103.s002.pdf]

Appendix 2: PODTEC Stool Submission Form (copy stays at clinic, original submitted to EPHI)

EPHI: put PODTEC barcode here

Clinic: put ASTTIE UPIC barcode here

**GENERAL INFORMATION, TO BE FILLED BY CLINIC SITE COORDINATOR**

Name of clinic:

\_\_\_\_\_

Name of person preparing stool sample for submission:

\_\_\_\_\_

Cell phone number:

\_\_\_\_\_

Name of participant:

\_\_\_\_\_

Participant eligible because Xpert-Ultra MTB-positive:

- on sputum/NGA  
 on stool

*tick all options that apply  
 note: if no option applies,  
 the child is not eligible for  
 PODTEC*

When did the child start TB treatment?

- \_\_ / \_\_ / \_\_\_\_  
 DD / MM / YYYY  
 treatment has not (yet) started

*note: if it is >5 days after  
 start of TB treatment, the  
 stool cannot be submitted*

What is the stool number submitted?

- first stool (used for diagnosis in ASTTIE project)  
 second stool  
 third stool

*tick only one option*

**INFORMATION RETRIEVED FROM PARENT/CAREGIVER, TO BE FILLED BY NURSE RECEIVING SAMPLE**

Date and time that stool was collected

\_\_ / \_\_ / \_\_\_\_      \_\_ : \_\_  
 DD / MM / YYYY      HH : MM

Where was the stool collected?

- on-the-spot in clinic, collected by nurse  
 on-the-spot in clinic, collected by caregiver  
 at the home of the caregiver

*→ go to next page  
 → go to next page*

Where was the sample stored before it was brought to the clinic?

- at room temperature: \_\_ °C\*  
 in the caregiver's refrigerator

*tick only one option  
 \*enter estimated  
 temperature*

|                                                                                  |                                                                                                                                                                                        |                                                                                                                                                                       |
|----------------------------------------------------------------------------------|----------------------------------------------------------------------------------------------------------------------------------------------------------------------------------------|-----------------------------------------------------------------------------------------------------------------------------------------------------------------------|
| How long did the caregiver travel from his/her home to the clinic?               | __ : __<br>HH : MM                                                                                                                                                                     | <i>enter estimated time</i>                                                                                                                                           |
| Where were the samples kept during the transport?                                | <input type="radio"/> at outside temperature: __ °C*<br><input type="radio"/> other, specify: __ °C*<br>_____                                                                          | <i>tick only one option</i><br><i>*enter estimated temperature</i>                                                                                                    |
| Date and time of <b>sample receipt from parent/caregiver:</b>                    | __ / __ / ____<br>DD / MM / YYYY                                                                                                                                                       | __ : __<br>HH : MM                                                                                                                                                    |
| <b>INFORMATION RETRIEVED FROM LABORATORY STORING STOOL BEFORE TRANSPORTATION</b> |                                                                                                                                                                                        |                                                                                                                                                                       |
| Before <b>sample pick-up by EPSE</b> , the sample was stored:                    | <input type="radio"/> at room temperature: __ °C*<br><input type="radio"/> in the refrigerator                                                                                         | <i>tick only one option</i><br><i>*enter estimated temperature</i>                                                                                                    |
| Date and time of <b>sample pick-up by EPSE:</b>                                  | __ / __ / ____<br>DD / MM / YYYY                                                                                                                                                       | __ : __<br>HH : MM                                                                                                                                                    |
| <b>INFORMATION TO BE FILLED BY EPHI LABORATORY TECHNICIAN</b>                    |                                                                                                                                                                                        |                                                                                                                                                                       |
| Date and time of sample <b>received at EPHI:</b>                                 | __ / __ / ____<br>DD / MM / YYYY                                                                                                                                                       | __ : __<br>HH : MM                                                                                                                                                    |
| Was the sample transported in cold-chain?                                        | <input type="radio"/> yes, from end-to-end<br><input type="radio"/> yes, partly<br>specify: _____<br><input type="radio"/> no<br><input type="radio"/> unknown                         | <i>tick only one option</i><br><i>*enter estimated temperature</i><br><i>note: option "unknown" should be avoided by asking EPSE courier for transport conditions</i> |
| What is the stool number <b>received according to EPHI information?</b>          | <input type="radio"/> remainder of first stool ( <i>this is the sample used for the diagnosis of TB</i> )<br><input type="radio"/> second sample<br><input type="radio"/> third sample | <i>tick only one option</i>                                                                                                                                           |
| Appearance of the stool sample:                                                  | <input type="radio"/> formed (solid)<br><input type="radio"/> unformed (soft)<br><input type="radio"/> taking the shape of the container (liquid)                                      | <i>tick only one option</i>                                                                                                                                           |
| Stool weight                                                                     | __ gram                                                                                                                                                                                | <i>please measure!</i>                                                                                                                                                |
