# Supplementary material for: The Simple One-step stool processing method for detection of Pulmonary tuberculosis: A study protocol to assess the robustness, stool storage conditions and sampling strategy for global implementation and scale-up
Source: PubMed Central journal article supplement (PMC9531811; doi:10.1371/journal.pone.0264103), 2022-10-04
Supplement: pone.0264103.s004.pdf [file pone.0264103.s004.pdf]

**Appendix 4: Laboratory experiment result capture form\***

EPHI: put PODTEC barcode here

|                                                             |                                                                                                                                                                                                                                                                                                                                                                                                    |                                                                              |
|-------------------------------------------------------------|----------------------------------------------------------------------------------------------------------------------------------------------------------------------------------------------------------------------------------------------------------------------------------------------------------------------------------------------------------------------------------------------------|------------------------------------------------------------------------------|
| 1. Stool sample number                                      | <input type="radio"/> 1 (first sample)<br><input type="radio"/> 2<br><input type="radio"/> 3                                                                                                                                                                                                                                                                                                       | <i>see middle part of code on barcode sticker on aliquot pot</i>             |
| 2. Aliquot number                                           | --                                                                                                                                                                                                                                                                                                                                                                                                 | <i>see last part of code on barcode sticker on aliquot pot</i>               |
| 3. Initials of laboratory technician conducting test: _____ |                                                                                                                                                                                                                                                                                                                                                                                                    |                                                                              |
| 4. Remarks on stool appearance:                             | <input type="radio"/> looks normal<br><input type="radio"/> overgrown with fungi<br><input type="radio"/> gas formation has caused lid to drop off<br><input type="radio"/> other, specify:<br>_____                                                                                                                                                                                               | <i>tick only one</i>                                                         |
| 5. Experiment number:                                       | <input type="radio"/> 1a (sample strategy: 3 different stools) → Q10<br><input type="radio"/> 1b (sample strategy: 3 aliquots of 1 stool) → Q10<br><input type="radio"/> 2 (storage conditions) → Q6<br><input type="radio"/> 3a (processing conditions) → Q7<br><input type="radio"/> 3b (maximum mixture storage time) → Q8<br><input type="radio"/> 3c (optimum amount of stool processed) → Q9 | <i>tick only one</i>                                                         |
| 6. a. Sample storage temperature                            | <input type="radio"/> Room (20-22 <sup>0</sup> C)<br><input type="radio"/> Incubator (35-37 <sup>0</sup> C)<br><input type="radio"/> Refrigerator (2-6 <sup>0</sup> C)<br><input type="radio"/> Freezer (-20 <sup>0</sup> C)                                                                                                                                                                       | <i>tick only one option</i>                                                  |
| b. Sample storage time                                      | <input type="radio"/> 4-6 hours<br><input type="radio"/> 24 hours<br><input type="radio"/> 72 hours (3 days)<br><input type="radio"/> 120 hours (5 days)                                                                                                                                                                                                                                           | <i>tick only one option</i><br><br><i>After filling this question: → Q10</i> |

|                                                                             |                                                                                                                                                                                                                                                                                                                                                                                                                                                                                                    |                                                                                     |
|-----------------------------------------------------------------------------|----------------------------------------------------------------------------------------------------------------------------------------------------------------------------------------------------------------------------------------------------------------------------------------------------------------------------------------------------------------------------------------------------------------------------------------------------------------------------------------------------|-------------------------------------------------------------------------------------|
| 7. a. Sample + SR buffer mixture processing time                            | <input type="radio"/> 10' + 10'<br><input type="radio"/> 10' + 5'<br><input type="radio"/> 15'<br><input type="radio"/> 10' + 10' vortex                                                                                                                                                                                                                                                                                                                                                           | <i>tick only one option</i>                                                         |
| 8. a. What was the contact time between sample and SR after initial mixing? | <input type="radio"/> 2 hours<br><input type="radio"/> 5 hours<br><input type="radio"/> 24 hours                                                                                                                                                                                                                                                                                                                                                                                                   | <i>tick only one option</i>                                                         |
| b. At what temperature was the sample/SR mixture stored?                    | <input type="radio"/> Room (20-22 <sup>0</sup> C)<br><input type="radio"/> Refrigerator (2-6 <sup>0</sup> C)                                                                                                                                                                                                                                                                                                                                                                                       | <i>tick only one option</i><br><i>After filling this question: → Q10</i>            |
| 9. Amount of stool tested                                                   | <input type="radio"/> 0.3 g<br><input type="radio"/> 0.5 g<br><input type="radio"/> 0.8 g<br><input type="radio"/> 1.0 g<br><input type="radio"/> 1.2 g                                                                                                                                                                                                                                                                                                                                            | <i>tick only one option</i>                                                         |
| 10. Date and time of stool processing for Xpert-Ultra started               | ___ / ___ / ____                      ___ : ___<br>DD / MM / YYYY                      HH : MM                                                                                                                                                                                                                                                                                                                                                                                                     |                                                                                     |
| 11. Date and time of Xpert-Ultra started                                    | ___ / ___ / ____                      ___ : ___<br>DD / MM / YYYY                      HH : MM<br><br><input type="checkbox"/> test not started, reason:<br>_____                                                                                                                                                                                                                                                                                                                                  |                                                                                     |
| 12. Xpert-Ultra result                                                      | <input type="radio"/> MTB trace detected <input type="radio"/> RIF resistant<br><input type="radio"/> MTB detected very low <input type="radio"/> RIF susceptible<br><input type="radio"/> MTB detected low <input type="radio"/> RIF indeterminate<br><input type="radio"/> MTB detected medium<br><input type="radio"/> MTB detected high<br><input type="radio"/> MTB not detected<br><input type="radio"/> Error code: ___<br><input type="radio"/> Invalid<br><input type="radio"/> No result | <i>tick only one option</i><br><i>for both the MTB</i><br><i>and the RIF result</i> |

|                                 |             |                         |
|---------------------------------|-------------|-------------------------|
| 13. Cycle threshold (Ct) values | Probe A: -- | Probe E: --             |
|                                 | Probe B: -- | Probe IS6110/IS1081: -- |
|                                 | Probe C: -- | SPC: --                 |
|                                 | Probe D: -- |                         |
